# Supplementary material
Source: publisher figshare collection journal article supplement (https://acs.figshare.com/ndownloader/files/4653622)
Supplement: Supplementary file 1 [file 4653622]

## SUPPORTING INFORMATION

# Large neutral amino acid transporter enables brain drug delivery via prodrugs

Mikko Gynther,<sup>†</sup> Krista Laine<sup>†</sup>, Jarmo Ropponen<sup>†</sup>, Jukka Leppänen<sup>†</sup>, Anne Mannila<sup>†</sup>, Tapio  
Nevalainen<sup>†</sup>, Jouko Savolainen<sup>‡</sup>, Tomi Järvinen<sup>†</sup> and Jarkko Rautio<sup>†</sup>

Department of Pharmaceutical Chemistry, University of Kuopio, P.O. Box 1627, FI-70211 Kuopio,  
Finland

<sup>†</sup>Department of Pharmaceutical Chemistry.

<sup>‡</sup>Fennopharma Ltd.

### Contents:

|                                                            |               |
|------------------------------------------------------------|---------------|
| Title page.                                                | S1            |
| Combustion analyses: Table S1                              | S2            |
| General synthetic procedures for compounds <b>2-5</b>      | S2-S9         |
| <b>In situ inhibition studies for compounds <b>2-5</b></b> | <b>S9-S10</b> |

**Table S1.** Combustion Analysis for Compounds **1-5**.

| Compd | Formula                                                                  | Anal. Calcd |      |      | Found |      |      |
|-------|--------------------------------------------------------------------------|-------------|------|------|-------|------|------|
|       |                                                                          | C           | H    | N    | C     | H    | N    |
| (1)   | C <sub>25</sub> H <sub>23</sub> NO <sub>5</sub> •HCl•H <sub>2</sub> O    | 63.63       | 5.55 | 2.97 | 63.73 | 5.29 | 3.35 |
| (2)   | C <sub>27</sub> H <sub>27</sub> NO <sub>5</sub> •HCl•1/4H <sub>2</sub> O | 66.79       | 2.88 | 5.90 | 66.48 | 3.10 | 6.08 |
| (3)   | C <sub>25</sub> H <sub>23</sub> NO <sub>4</sub> •1/5H <sub>2</sub> O     | 74.13       | 5.82 | 3.46 | 73.73 | 5.92 | 3.49 |
| (4)   | C <sub>24</sub> H <sub>29</sub> NO <sub>5</sub> •HCl                     | 63.71       | 6.79 | 3.10 | 63.87 | 6.82 | 3.33 |
| (5)   | C <sub>22</sub> H <sub>25</sub> NO <sub>4</sub>                          | 71.91       | 6.86 | 3.81 | 71.45 | 7.02 | 3.71 |

**Experimental detail of synthesis of compounds 2-5****2-(3-Benzoyl-phenyl)-propionic acid 2-hydroxy-ethyl ester**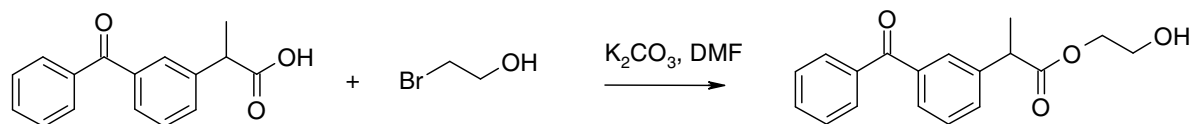

Ketoprofen (1.71 g, 6.70 mmol) and K<sub>2</sub>CO<sub>3</sub> (1.20 g, 8.71 mmol) were stirred with DMF (40 mL) at 60°C. Bromoethanol (1.09 g, 8.71 mmol) was added and mixture was stirred over night at 60°C. Mixture was cooled and water (125 mL) was added and washed with ethyl acetate (5\*25 mL). Combined organic phases was dried with Na<sub>2</sub>SO<sub>4</sub> and purified by flash chromatography (petrolether:ethylacetate 1:1), R<sub>f</sub> = 0.31. Yield 1.60 g (80 %).

<sup>1</sup>H-NMR (CDCl<sub>3</sub>) δ 1.54 (3H, d, *J* = 7.2 Hz, CH<sub>3</sub>), 2.60 (1H, bs, OH), 3.77 (2H, t, *J* = 4.7 Hz, CH<sub>2</sub>), 3.85 (1H, q, *J* = 7.2 Hz, CH<sub>3</sub>), 4.17-4.25 (2H, m, CH<sub>2</sub>), 7.42-7.50 (3H, m, ArH), 7.54-7.60 (2H, m, ArH), 7.65-7.66 (1H, m, ArH), 7.78-7.80 (3H, m, ArH). <sup>13</sup>C-NMR (CDCl<sub>3</sub>) δ 18.5,

45.3, 60.9, 66.5, 128.3, 128.6, 129.1, 129.2, 130.1, 131.5, 132.6, 137.3, 137.9, 140.8, 174.4, 196.7. MS:  $m/z$  calcd. for  $C_{18}H_{18}O_4$   $[M]^+ = 298.3$  Found 299.1  $[M + 1]^+$ .

**(S)-2-*tert*-Butoxycarbonylamino-3-phenyl-propionic acid 2-[2-(3-benzoyl-phenyl)-propionyloxy]-ethyl ester**

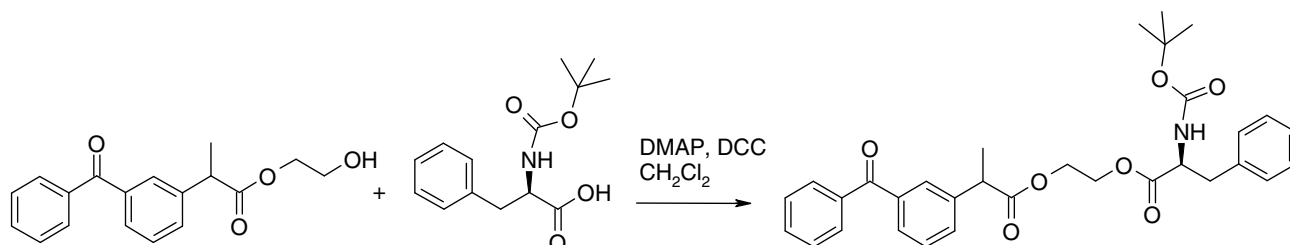

Alcohol (0.60 g, 2.01 mmol), BOC-L-phenyl alanine (0.56 g, 2.11 mmol) and DMAP (0.02 g, 0.20mmol) were dissolved to dichloromethane (25 mL). DCC (0.54 g, 2.61 mmol) was added and mixture was stirred at R.T. under argon over night. Formed solid was filtered and filtrate was evaporated and purified by flash chromatography (hexane:ethyl acetate 4:1),  $R_f = 0.14$ . Combined fractions were evaporated and dried in vacuo. Yield of clear viscous oil was 1.02 g (93 %).

$^1H$ -NMR ( $CDCl_3$ ):  $\delta$  1.40 (9H, s,  $CH_3$ ), 1.55 (3H, d,  $J = 7.2$  Hz,  $CH_3$ ), 2.92-3.07 (2H, m,  $CH_2$ -Bz), 3.82 (1H, q,  $J = 7.2$  Hz,  $CHCH_3$ ), 4.18-4.34 (4H, m,  $OCH_2CH_2O$ ), 4.55 (1H, q,  $J = 6.6$  Hz,  $CHCH_2$ ), 4.97 (1H, d,  $J = 6.7$  Hz,  $NH$ ), 7.08-7.09 (2H, d,  $J = 9.0$  Hz,  $ArH$ ), 7.20-7.31 (3H, m,  $ArH$ ), 7.41-7.49 (3H, m,  $ArH$ ), 7.53-7.55 (1H, m,  $ArH$ ), 7.57-7.60 (1H, m,  $ArH$ ), 7.64-7.66 (1H, m,  $ArH$ ), 7.76-7.78 (3H, m,  $ArH$ ).  $^{13}C$ -NMR ( $CDCl_3$ )  $\delta$  18.5, 28.3, 38.2, 45.2, 54.3, 62.4, 62.7, 79.9, 127.1, 128.3, 128.5, 128.6, 129.15, 129.20, 129.3, 130.1, 131.5, 132.5, 135.9, 137.5, 138.0, 140.5, 155.1, 171.6, 173.8, 196.4. MS:  $m/z$  calcd. for  $C_{32}H_{35}NO_7$   $[M]^+ = 545.6$  Found 545.8  $[M]^+$ ;  $[M + Na]^+ = 568.6$ . Found 568.1  $[M + Na]^+$ .

**(S)-2-Amino-3-phenyl-propionic acid 2-[2-(3-benzoyl-phenyl)-propionyloxy]-ethyl ester (2)**

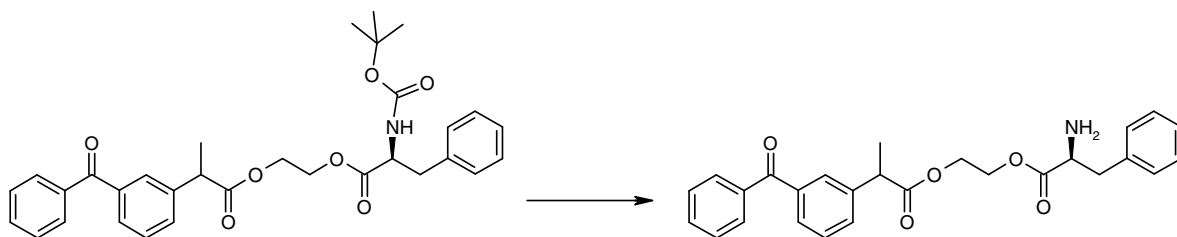

Boc-protected derivative (0.94 g, 1.72 mmol) was dissolved to ethyl acetate (35 mL) and HCl gas was added to the mixture over 30 minutes. The solvent was evaporated and the product was dried in vacuo. Yield of white solid was 0.78 g (95 %).

$^1\text{H-NMR}$  ( $\text{CDCl}_3$ ):  $\delta$  1.51 (3H, dd,  $J = 7.2$  Hz,  $\text{CH}_3$ ), 3.24-3.39 (2H, m,  $\text{CH}_2\text{-Bz}$ ), 3.82 (1H, q,  $J = 7.2$  Hz,  $\text{CHCH}_3$ ), 4.06-4.37 (5H, m,  $\text{OCH}_2\text{CH}_2\text{O} + \text{COCHCH}_2$ ), 7.17-7.25 (5H, bs,  $\text{ArH}$ ), 7.38-7.47 (3H, m,  $\text{ArH}$ ), 7.51-7.62 (3H, m,  $\text{ArH}$ ), 7.73-7.75 (3H, m,  $\text{ArH}$ ), 8.82 (3H, bs,  $\text{NH}_3\text{Cl}_3$ ).  $^{13}\text{C-NMR}$  ( $\text{CDCl}_3$ )  $\delta$  18.4, 18.7, 36.1, 45.0, 45.1, 54.2, 62.1, 63.7, 63.8, 127.7, 128.3, 128.6, 128.8, 128.9, 129.0, 129.04, 129.2, 129.5, 130.1, 130.04, 131.56, 131.6, 132.5, 132.55, 133.65, 133.67, 137.3, 137.9, 140.54, 140.56, 168.40, 168.41, 173.7, 196.43, 196.47. MS:  $m/z$  calcd. for  $\text{C}_{27}\text{H}_{27}\text{NO}_5$   $[\text{M}]^+ = 445.52$  Found 446.1  $[\text{M}+1]^+$ .

### 2-Amino-3-phenyl-propionic acid methyl ester

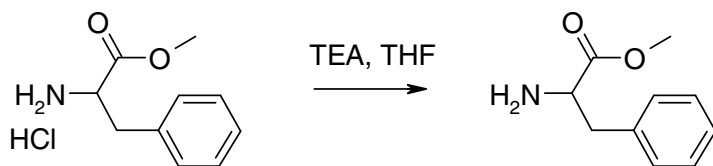

L-Phenylalanine methylester hydrochloride (1.00 g, 4.64 mmol) was dissolved to tetrahydrofuran (15 mL). Triethylamine (0.47 g, 4.64 mmol) was added and mixture was stirred at R.T. for 3h. Formed solid was filtered and filtrate was evaporated and dried in vacuo. Yield of clear viscous oil was quantitative.

$^1\text{H-NMR}$  ( $\text{CDCl}_3$ ):  $\delta$  1.49 (2H, s,  $\text{NH}_2$ ), 2.84 (1H, dd,  $J = 7.9$  Hz, 13.5 Hz,  $\text{CH}_a$ ), 3.07 (1H, dd,  $J = 5.1$  Hz, 13.5 Hz,  $\text{CH}_b$ ), 3.69 (3H, s,  $\text{OCH}_3$ ), 3.69-3.73 (1H, m,  $\text{CH}_2\text{CHCO}$ ), 7.16-7.30 (5H, m,  $\text{ArH}$ ).  $^{13}\text{C-NMR}$  ( $\text{CDCl}_3$ )  $\delta$  41.0, 51.8, 55.7, 126.7, 128.4, 129.1, 137.1, 175.2.

### 2-[2-(3-Benzoyl-phenyl)-propionylamino]-3-phenyl-propionic acid methyl ester

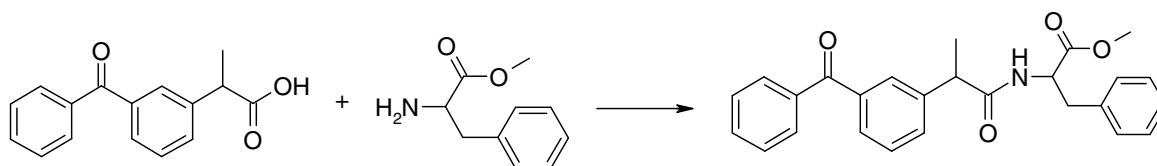

Ketoprofen (1.10 g, 4.34 mmol), L-phenylalanine methyl ester (0.74 g, 4.13 mmol) and DMAP (0.05 g, 0.413 mmol) were dissolved to dichloromethane (25 mL). DCC (0.98 g, 4.75 mmol) was added and mixture was stirred at R.T. under argon over night. Formed solid was filtered and filtrate was evaporated and purified by flash chromatography (hexane:ethyl acetate 3:1). Combined fractions were evaporated and dried in vacuo. Yield of clear viscous oil was 1.6 g (88 %).

$^1\text{H-NMR}$  ( $\text{CDCl}_3$ ):  $\delta$  1.51 (3H, d,  $J = 7.0$  Hz,  $\text{CH}_3$ ), 2.97 (2H, m,  $\text{CH}_2\text{-Bn}$ ), 3.60 (1H, q,  $J = 7.1$  Hz,  $\text{CH-CH}_3$ ), 3.70 (3H, d,  $J = 18.5$  Hz,  $\text{OCH}_3$ ), 4.80-4.89 (1H, m,  $\text{CH}_2\text{CHCO}$ ), 5.87 (1H, bs,  $\text{NH}$ ), 6.77-7.22 (5H, m,  $\text{ArH}$ ), 7.42-7.78 (9H, m,  $\text{ArH}$ ).  $^{13}\text{C-NMR}$  ( $\text{CDCl}_3$ )  $\delta$  18.2, 18.4, 37.61, 37.62, 46.81, 46.83, 52.31, 52.34, 52.9, 53.1, 127.04, 127.12, 128.33, 128.36, 128.46, 128.56, 128.77, 128.85, 129.10, 129.13, 129.15, 129.19, 129.24, 130.05, 130.07, 131.47, 131.61, 132.53, 132.56, 135.39, 135.65, 137.4, 138.04, 138.08, 140.97, 141.0, 171.75, 171.85, 172.79, 173.09, 196.37, 196.41. MS:  $m/z$  calcd. for  $\text{C}_{26}\text{H}_{25}\text{NO}_4$   $[\text{M}]^+ = 415.49$  Found 416.0  $[\text{M}+1]^+$ .

### 2-[2-(3-Benzoyl-phenyl)-propionylamino]-3-phenyl-propionic acid (3)

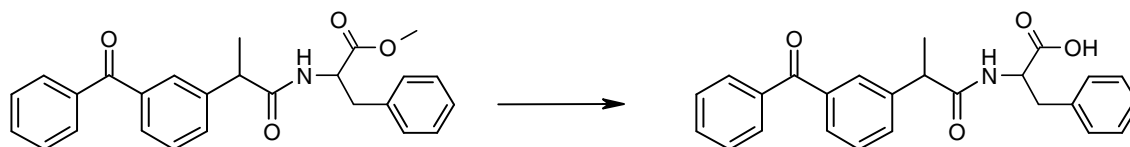

Methyl ester (0.2 g, 0.48 mmol), was dissolved to methanol water mixture (15 mL:15 mL) and 1 M LiOH (4 mL) was added. Mixture was stirred at R.T. until reaction was completed. Mixture was acidified with 12 M HCl and methanol was evaporated. Product was extracted with diethyl ether (3\*10 mL) and a combined organic phase was dried with Na<sub>2</sub>SO<sub>4</sub>. Solvent was evaporated and formed solid was dried in vacuo. Yield of the white solid was 0.145 g (76%).

<sup>1</sup>H-NMR (CDCl<sub>3</sub>): δ 1.47 (3H, d, *J* = 7.0 Hz, CH<sub>3</sub>), 2.92-3.21 (2H, m, CH<sub>2</sub>-Bn), 3.49 (1H, q, *J* = 7.0 Hz, CH-CH<sub>3</sub>), 3.64-3.72 (1H, m, CH<sub>2</sub>CHCO), 4.83-4.94 (1H, m, NH), 6.60-7.16 (5H, m, ArH), 7.34-7.76 (9H, m, ArH), 10.65 (1H, bs, COOH). <sup>13</sup>C-NMR (CDCl<sub>3</sub>) δ 17.8, 18.1, 36.98, 37.0, 46.12, 46.21, 52.71, 52.94, 126.6, 126.73, 128.05, 128.10, 128.13, 128.2, 128.43, 128.47, 128.94, 128.99, 129.01, 129.07, 129.24, 129.88, 129.90, 131.34, 131.57, 132.41, 132.48, 135.34, 135.61, 137.0, 137.47, 137.51, 140.67, 141.20, 173.32, 173.44, 173.61, 173.97, 196.57, 196.71. MS: *m/z* calcd. for C<sub>25</sub>H<sub>23</sub>NO<sub>4</sub> [M]<sup>+</sup> = 401.47 Found 401.9 [M]<sup>+</sup>; [M + NH<sub>4</sub><sup>+</sup>]<sup>+</sup> = 419.52 Found 419.0 [M + NH<sub>4</sub><sup>+</sup>]<sup>+</sup>.

**(S)-2-*tert*-Butoxycarbonylamino-4-methyl-pentanoic acid**      **2-[2-(3-benzoyl-phenyl)-propionyloxy]-ethyl ester**

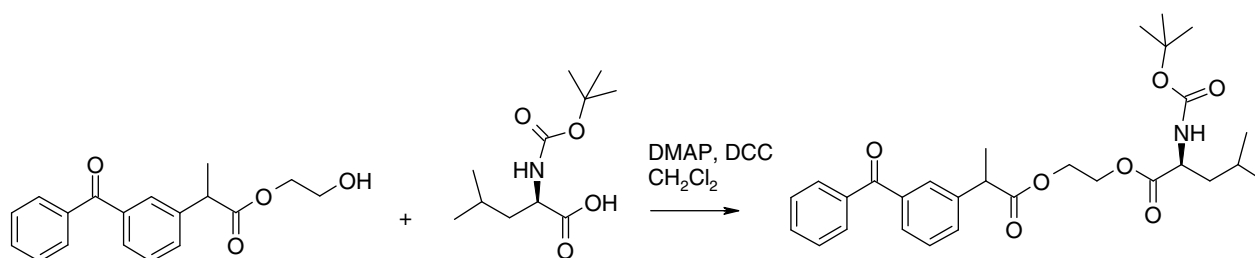

Alcohol (0.60 g, 2.01 mmol), BOC-L-leucine (0.49 g, 2.11 mmol) and DMAP (0.02 g, 0.20 mmol) were dissolved to dichloromethane (25 mL). DCC (0.54 g, 2.61 mmol) was added and mixture was stirred at R.T. under argon over night. Formed solid was filtered and filtrate was evaporated and purified by flash chromatography (petrol ether:ethyl acetate 4:1),  $R_f = 0.15$ . Combined fractions were evaporated and dried in vacuo. Yield of clear viscous oil was 0.97 g (94 %).

$^1\text{H-NMR}$  ( $\text{CDCl}_3$ ):  $\delta$  0.91 (3H, d,  $J = 3.5$  Hz,  $\text{CH}_3$ ), 0.92 (3H, d,  $J = 3.4$  Hz,  $\text{CH}_3$ ), 1.43 (9H, s,  $\text{CH}_3$ ), 1.55 (3H, d,  $J = 7.2$  Hz,  $\text{CH}_3$ ), 1.50-1.58 (1H, m,  $\text{CH}$ ), 1.65-1.73 (2H, m,  $\text{CH}_2$ ), 3.83 (1H, q,  $J = 7.1$  Hz,  $\text{CHCH}_3$ ), 4.21-4.38 (4H, m,  $\text{OCH}_2\text{CH}_2\text{O}$ ), 4.91 (1H, t,  $J = 7.0$  Hz,  $\text{NH}$ ), 7.43-7.51 (3H, m,  $\text{ArH}$ ), 7.54-7.56 (1H, m,  $\text{ArH}$ ), 7.59-7.62 (1H, m,  $\text{ArH}$ ), 7.67-7.69 (1H, m,  $\text{ArH}$ ), 7.76-7.82 (3H, m,  $\text{ArH}$ ).  $^{13}\text{C-NMR}$  ( $\text{CDCl}_3$ ):  $\delta$  18.5, 21.8, 22.8, 24.8, 28.3, 41.6, 45.2, 52.0, 62.5, 62.6, 79.9, 128.3, 128.6, 129.2, 130.1, 131.5, 132.5, 137.5, 138.0, 140.6, 155.1, 173.2, 173.8, 196.5. MS:  $m/z$  calcd. for  $\text{C}_{29}\text{H}_{37}\text{NO}_7$   $[\text{M}]^+ = 511.6$  Found 511.8  $[\text{M}]^+$ ;  $[\text{M} + \text{Na}]^+ = 534.6$ . Found 534.1  $[\text{M} + \text{Na}]^+$ .

**(S)-2-Amino-4-methyl-pentanoic acid 2-[2-(3-benzoyl-phenyl)-propionyloxy]-ethyl ester hydrochloride (4)**

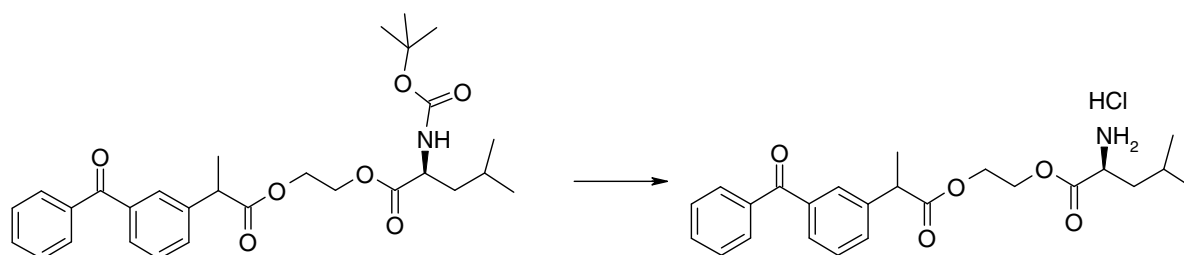

Boc-protected compound (0.895 g, 1.75 mmol) was dissolved to ethyl acetate (35 mL) and HCl gas was added to the mixture over 30 minutes. The solvent was evaporated and the product was dried in vacuo. Yield of white solid was 0.66 g (92 %).

$^1\text{H-NMR}$  ( $\text{CDCl}_3$ ):  $\delta$  0.93 (3H, s,  $\text{CH}_3$ ), 0.94 (3H, s,  $\text{CH}_3$ ), 1.53 (3H, d,  $J = 7.1$  Hz,  $\text{CH}_3$ ), 1.76-1.81 (1H, m,  $\text{CH}$ ), 1.89-1.98 (2H, m,  $\text{CH}_2$ ), 3.84 (1H, q,  $J = 7.0$  Hz,  $\text{CHCH}_3$ ), 4.02-4.06

(1H, m, COCH(NH<sub>3</sub>Cl)CH<sub>2</sub>), 4.21-4.45 (4H, m, OCH<sub>2</sub>CH<sub>2</sub>O), 7.42-7.49 (3H, m, ArH), 7.53-7.66 (3H, m, ArH), 7.75-7.79 (3H, m, ArH), 8.91 (3H, bs, CHNH<sub>3</sub>Cl). <sup>13</sup>C-NMR (CDCl<sub>3</sub>) δ 18.5, 22.1, 22.4, 24.5, 39.6, 45.3, 51.8, 62.2, 63.9, 128.5, 128.7, 129.2, 129.3, 130.2, 131.7, 132.7, 137.5, 138.1, 140.7, 169.4, 173.9, 196.6. MS: *m/z* calcd. for C<sub>24</sub>H<sub>29</sub>NO<sub>5</sub> [M]<sup>+</sup> = 411.5 Found 412.1 [M+1]<sup>+</sup>.

### 2-Amino-4-methyl-pentanoic acid methyl ester

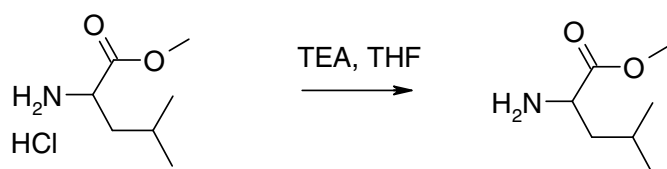

L-Leucine methylester hydrochloride (1.00 g, 5.50 mmol) was dissolved to tetrahydrofuran (15 mL). Triethylamine (0.56g, 5.50 mmol) was added and mixture was stirred at R.T. for 3h. Formed solid was filtered and filtrate was evaporated and dried in vacuo. Yield of clear viscous oil was 0.70 g (88%).

<sup>1</sup>H-NMR (CDCl<sub>3</sub>): δ 0.85 (3H, d, *J* = 6.6 Hz, CH<sub>3</sub>), 0.87 (3H, d, *J* = 6.7 Hz, CH<sub>3</sub>), 1.32-1.38 (1H, m, CH<sub>a</sub>), 1.46-1.52 (1H, m, CH<sub>b</sub>), 1.66 (2H, bs, NH<sub>2</sub>), 1.66-1.74 (1H, m, CH), 3.41 (1H, dd, *J* = 4.8 Hz, CH), 3.64 (3H, s, CH<sub>3</sub>). <sup>13</sup>C-NMR (CDCl<sub>3</sub>) δ 21.7, 22.8, 24.6, 43.9, 51.7, 52.6, 176.9.

### 2-[2-(3-Benzoyl-phenyl)-propionylamino]-4-methyl-pentanoic acid methyl ester

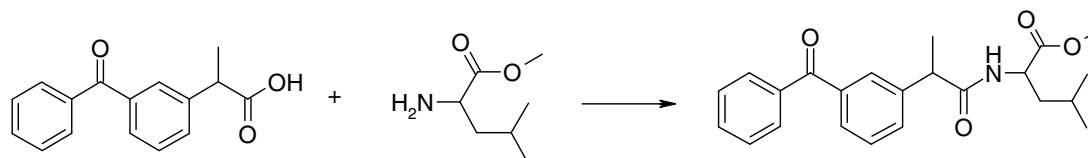

Ketoprofen (0.88 g, 3.31 mmol), L-leucine methyl ester (0.48 g, 3.47 mmol) and DMAP (0.04 g, 0.33 mmol) were dissolved to dichloromethane (25 mL). DCC (0.78 g, 3.80 mmol) was



added and mixture was stirred at R.T. under argon over night. Formed solid was filtered and filtrate was evaporated and purified by flash chromatography (hexane:ethyl acetate 3:1). Combined fractions were evaporated and dried in vacuo. Yield of clear viscous oil was 1.18 g (94%).

$^1\text{H-NMR}$  ( $\text{CDCl}_3$ ):  $\delta$  0.91 (3H, d,  $J = 6.1$  Hz,  $\text{CH}_3$ ), 0.92 (3H, d,  $J = 5.5$  Hz,  $\text{CH}_3$ ), 1.45-1.51 (1H, m, CH), 1.55 (3H, d,  $J = 7.2$  Hz,  $\text{CH}_3$ ), 1.58-1.64 (2H, m,  $\text{CH}_2$ ), 3.67 (3H, s,  $\text{CH}_3$ ), 3.67 (1H, q,  $J = 7.1$  Hz, CH), 4.58-4.63 (1H, m, CH), 5.80 (1H, d,  $J = 7.9$  Hz, NH), 7.46-7.51 (3H, m, ArH), 7.58-7.62 (2H, m, ArH), 7.68-7.70 (1H, m, ArH), 7.75-7.81 (3H, m, ArH).  $^{13}\text{C-NMR}$  ( $\text{CDCl}_3$ )  $\delta$  18.6, 21.9, 22.7, 24.8, 41.5, 46.8, 50.8, 52.1, 128.3, 128.7, 129.1, 129.2, 130.0, 132.5, 137.4, 138.0, 141.3, 173.2, 176.3, 196.5. MS:  $m/z$  calcd. for  $\text{C}_{23}\text{H}_{27}\text{NO}_4$   $[\text{M}+1]^+ = 382.48$  Found 382.1  $[\text{M}]^+$ .

#### 2-[2-(3-Benzoyl-phenyl)-propionylamino]-4-methyl-pentanoic acid (5)

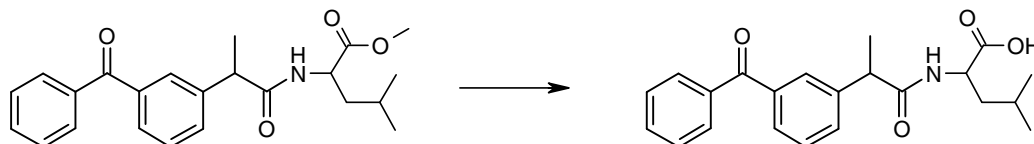

Methyl ester (0.48 g, 1.26 mmol), was dissolved to methanol water mixture (15 mL:15 mL) and 1 M LiOH (4 mL) was added. Mixture was stirred at R.T. until reaction was completed. Mixture was acidified with 12 M HCl and methanol was evaporated. Product was extracted with diethyl ether (3\*10 mL) and a combined organic phase was dried with  $\text{Na}_2\text{SO}_4$ . Solvent was evaporated and formed solid was dried in vacuo. Yield of white solid was 0.28 g (61%).

$^1\text{H-NMR}$  ( $\text{CDCl}_3$ ):  $\delta$  0.89 (3H, d,  $J = 2.5$  Hz,  $\text{CH}_3$ ), 0.90 (3H, d,  $J = 2.6$  Hz,  $\text{CH}_3$ ), 1.45-1.51 (1H, m, CH), 1.54 (3H, d,  $J = 7.2$  Hz,  $\text{CH}_3$ ), 1.57-1.67 (2H, m,  $\text{CH}_2$ ), 3.70 (1H, q,  $J = 7.1$  Hz, CH), 4.55-4.59 (1H, m, CH), 6.07 (1H, d,  $J = 8.0$  Hz, NH), 7.41-7.49 (3H, m, ArH), 7.57-7.60 (2H, m, ArH), 7.64-7.66 (1H, m, ArH), 7.74-7.78 (3H, m, ArH).  $^{13}\text{C-NMR}$  ( $\text{CDCl}_3$ )  $\delta$  18.5, 21.8, 22.8, 24.9, 40.9, 46.7, 51.0, 128.4, 128.8, 129.26, 129.29, 130.1, 131.7, 132.7, 137.3,

138.0, 141.2, 174.2, 176.3, 196.8. MS:  $m/z$  calcd. for  $C_{22}H_{25}NO_4$   $[M]^+ = 367.45$ , Found 385.0  $[M + NH_4^+]^+$ .

**In situ inhibition studies for compounds 2-5.** The ability of the prodrug to bind into LAT1 was studied with the in situ rat brain perfusion technique. The 100% PA product of  $[^{14}C]$ -leucine was determined after 30 s perfusion of 0.2  $\mu$ Ci/mL  $[^{14}C]$ -leucine solution. In a competition study  $[^{14}C]$ -leucine (0.2  $\mu$ Ci/mL) was co-perfused with 70  $\mu$ M concentration of the prodrugs for 30 s. In the presence of **2-5** the PA product of  $[^{14}C]$ -leucine was  $0.02815 \pm 0.0059$ ,  $0.01910 \pm 0.0063$ ,  $0.02117 \pm 0.0072$ ,  $0.02655 \pm 0.0018$ , respectively (mean  $\pm$  s.d., n=2). The addition of the prodrugs did not significantly decrease the uptake of  $[^{14}C]$ -leucine.
